# Supplementary material for: Service Use Preceding Opioid-Related Fatality
Source: Atypon-hosted journal article supplement (doi:10.1176/appi.ajp.2017.17070808), 2017-11-28
Supplement: appi.ajp.2017.17070808.ds001.pdf [file appi.ajp.2017.17070808.ds001.pdf]

| Table S1: ICD Codes of Diagnostic Groups |                                                                                                                                                                       |
|------------------------------------------|-----------------------------------------------------------------------------------------------------------------------------------------------------------------------|
| <i>Diagnostic Group</i>                  | <i>ICD-9-Codes</i>                                                                                                                                                    |
| Drug use disorders                       | 292, 304, 305.1, 305.2, 305.3, 305.4, 305.6, 305.7, 305.8, 305.9                                                                                                      |
| Opioid use disorder                      | 304.00, 304.01, 304.02, 304.03, 307.03, 305.50, 305.51, 305.52, 305.53                                                                                                |
| Alcohol use disorders                    | 291, 303, 305.0                                                                                                                                                       |
| Depressive disorders                     | 296.2x, 296.3x, 296.82, 298.0, 300.4, 311                                                                                                                             |
| Bipolar disorders                        | 296.0x, 296.1x, 296.4x, 296.5x, 296.6x, 296.7x, 296.8x (other than 296.82)                                                                                            |
| Anxiety disorders                        | 293.84, 300.0x, 300.2x, 300.3, 300.7, 308.0-308.9, 309.21, 309.81, 312.39, 313.0, 313.21, 313.23                                                                      |
| Schizophrenia                            | 295.00-295.99                                                                                                                                                         |
| Personality disorders                    | 301                                                                                                                                                                   |
| Other mental disorders                   | 290-319 not included in other diagnostic groups                                                                                                                       |
| Chronic pain conditions                  | 338.0, 338.2, 338.4, 339, 346, 307.81, 337.0–337.19, 350.2, 354.0, 354.4, 355.5, 355.71, 356–357, 377, 710–719, 720–724, 725–729, 731–738, 784.0, 805, 806, 846, 847. |
| <i>Nonfatal poisoning</i>                | <i>ICD-9 codes</i>                                                                                                                                                    |
| Opioids                                  | 965.0, E850.0, E850.1, E850.2                                                                                                                                         |
| Benzodiazepines                          | 969.4, E853.2                                                                                                                                                         |
| Other psychotropic medications           | 969.0, 969.1, 969.2, 969.3, 969.5, 969.7, 969.8, 969.9, E853, E950.3, E980.1, E980.2, E854.0, E854.2, E854.3, E854.8                                                  |
| <i>Causes of death - poisoning</i>       | <i>ICD-10 codes</i>                                                                                                                                                   |
| Heroin                                   | T40.1                                                                                                                                                                 |
| Methadone                                | T40.3                                                                                                                                                                 |
| Other synthetic opioids                  | T40.4                                                                                                                                                                 |
| Natural and synthetic opioids            | T40.0, T40.2                                                                                                                                                          |
| Other narcotics                          | T40.6                                                                                                                                                                 |
| Benzodiazepines                          | T42.4                                                                                                                                                                 |
| Alcohol                                  | T51.0, T51.9                                                                                                                                                          |
